# Supplementary material for: Multi-Angular Colorimetric Responses of Uni- and Omni-Directional Femtosecond Laser-Induced Periodic Surface Structures on Metals
Source: MDPI journal article supplement (doi:10.3390/nano11082010), 2021-08-05
Supplement: s1 [file s1]

## Supplementary Materials

# Multi-Angular Colorimetric Responses of Uni- and Omni-Directional Femtosecond Laser-Induced Periodic Surface Structures on Metals

Taek-Yong Hwang <sup>1,\*</sup>, Yong-dae Kim <sup>1</sup>, Jongweon Cho <sup>2</sup>, Hai-Joong Lee <sup>3</sup>, Hyo-Soo Lee <sup>3</sup> and Byounghwak Lee <sup>4,\*</sup>

<sup>1</sup> Shape Manufacturing R&D Department, Korea Institute of Industrial Technology, Bucheon 14441, Korea; ydkim@kitech.re.kr

<sup>2</sup> Department of Physics, Myongji University, Yongin 17058, Korea; jwcho@mju.ac.kr

<sup>3</sup> Advanced Materials and Process R&D Department, Korea Institute of Industrial Technology, Incheon 21999, Korea; rookiehj@kitech.re.kr (H.-J.L.); todd3367@kitech.re.kr (H.-S.L.)

<sup>4</sup> Department of Physics and Chemistry, Korea Military Academy, Seoul 01805, Korea

\* Correspondence: taekyong@kitech.re.kr (T.-Y.H.); lebaiai@mnd.go.kr (B.L.)

It is worth mentioning that the distinct change in  $b^*$  with  $\varphi$  observed at  $\theta = -30^\circ$  in Figure 4b also relates both to diffraction and Rayleigh anomalies. In addition to the wavelength ranges of diffracted light for  $\theta = -30^\circ$  described in Figure 5a, the -1st order diffracted light with the wavelengths longer than the cutoff wavelength for  $m = -2$  can be effectively diffused into our spectrometer due to the surface roughness and quasi-periodicity of UD-LSFLs, since the angle of -1st order diffraction at these wavelengths is the closest to our detection angle of  $-30^\circ$  among those of all available diffraction orders. As discussed in the cases of  $\theta = 20^\circ$  and  $30^\circ$  on UD-LSFLs, the power redistribution due to Rayleigh anomalies consistently increases  $b^*$  with  $\varphi$ . Similarly, as  $\varphi$  changes from  $0^\circ$  to  $25^\circ$ ,  $b^*$  continuously increases through more power redistribution to the diffused light. However, with a further increase in  $\varphi$  until  $50^\circ$ , the total amount of diffused light toward our detection angle shrinks much faster than the increasing redistributed power originating from Rayleigh anomalies due to our restricted color measurement in the  $ik$  plane, and  $b^*$  eventually reduces to near zero at this detection angle.
